# Supplementary material for: The α-Gliadins in Bread Wheat: Effect of Nitrogen Treatment on the Expression of the Major Celiac Disease Immunogenic Complex in Two RNAi Low-Gliadin Lines
Source: Front Plant Sci. 2021 Apr 29;12:663653. doi: 10.3389/fpls.2021.663653 (PMC8116895; doi:10.3389/fpls.2021.663653)
Supplement: Supplementary file 3 [file Table_1.XLSX]

## Sheet: Amplicon_features
Supplementary Table 1. Amplicon variants and their features. Amplicons followed by an asterisk are pseudogenes
Amplicon ID	DNA sequence	Protein sequence	Genome	Lenght_bp	Lenght_aa	Number stop codons	p31-43	DQ2.5_glia_a1a	DQ2.5_glia_a1b	DQ2.5_glia_a2	DQ2.5_glia_a3	Total epitopes	DNARep1	DNARep2	DNARep3	DNARep4	Average DNA Frequency	SD
Amp1*	GTTAGAGTTCCAGTGCCACAATTGTAGCCGCAAAATCCATCTCAACAACGACCACAATAGTAATTTCCGTTGGTGCAACAACAACAATTTCCAGGGCAGCAACAACCATTCCCACCACAACAGCCATATCCGCAGCCGCAACCGTTTCTGTCACAACAACCATATTCGCAACCGTAACCATTTCCGCCACAACTACCATATCCACAAGCGCAACCATTTCCAACACAACAACCATATCCACAACCGCAACCACAGTATCCGCAACCACAACAACC	VRVPVPQL*PQNPSQQRPQ**FPLVQQQQFPGQQQPFPPQQPYPQPQPFLSQQPYSQP*PFPPQLPYPQAQPFPTQQPYPQPQPQYPQPQQ	B	275	91	4	1	0	0	0	0	1	1.21479	1.7863	2.20889	1.7301	1.73502	0.407365
Amp2*	GTTAGAGTTACAGTGCCACAATTGCAGCCATAAAATCCATCTCAGCAACAGCCACAAGAGCAAGTTCCATTGGTACAACAACAACAATTTCTAGGGCAGTAACAACCATTTCCACCACAACAACCATATCCACAGCCGCAACCATTTCCATCACAACAACCATATCTGCAGCTGCAACCATTTCCGCAGCCGCAACTACCATATTCGCAGCCACAACCATTTCGACCACAACAACCATATCCACAACCGCAACCACAGTATTCGCAACCACAACAACC	VRVTVPQLQP*NPSQQQPQEQVPLVQQQQFLGQ*QPFPPQQPYPQPQPFPSQQPYLQLQPFPQPQLPYSQPQPFRPQQPYPQPQPQYSQPQQ	A	278	92	2	0	1	0	0	1	2	9.70315	8.32518	9.96826	9.91545	9.47801	0.777044
Amp3	GTTAGAGTTCCAGTGCCACAATTGCAGCCACAAAATCCATCTCAGCAACAACCACAAAAGCAAGTTCCATTGGTACAACAACAACAATTTCCAGGGCAGCAACAACCATTTCCACCACAACAGCCATATCCGCAGCTGCAACCATTTCCATCACAACAACCATATATGCAGCTGCAACCATTTCCGCAGCCGCAACTACCATATCCGCAGCCGCAACTACCATATCCGCAGCCGCAACCATTTCGACCACAACAATCATATCCACAACCGCAACCACAGTATTCGCAACCACAACAACC	VRVPVPQLQPQNPSQQQPQKQVPLVQQQQFPGQQQPFPPQQPYPQLQPFPSQQPYMQLQPFPQPQLPYPQPQLPYPQPQPFRPQQSYPQPQPQYSQPQQ	D	299	99	0	1	1	1	2	0	5	4.71358	5.30456	5.91356	4.85775	5.19736	0.539696
Amp4	GTTAGAGTTTCAGTGCCACAATTGCAGCCACAAAATCCATCTCAGCAACAGCCACAAGAGCAAGTTCCATTGGTACAACAACAACAATTTCTAGGGCAGCAACAACCATTTCCACCACAACAACCATATCCACAGCTGCAACCATTTCCATCACAACAACCATATCTGCAGCTGCAACCATTTCCGCAGCCGCAACTACCATATTCACAGCCACAACCATTTCGACCACAACAACCATATCCACAACCGCAACCACAGTATTCGCAACCACAACAACC	VRVSVPQLQPQNPSQQQPQEQVPLVQQQQFLGQQQPFPPQQPYPQLQPFPSQQPYLQLQPFPQPQLPYSQPQPFRPQQPYPQPQPQYSQPQQ	A	278	92	0	1	1	0	0	1	3	5.60892	4.93731	5.88964	6.6487	5.77114	0.70846
Amp5*	TTTAGAATTCCAGTGCCACAATTGCTGCCAAAAAATCCATCTTAGCAACAGCCACAATAGCAAGTTCCATTGGTACAACAACAACAATTTCTAGGGCAGCAACAACCATTTCCACCACAACAACCATATCCACAGCCGCAACCATTTCCATCACAACAACCATATCTGCAGCTGCAACCATTTCCGCAGCCGCAACTACCATATTCGCAGCCGCAACCATTTCGACCACAACAACCATATCCACAACCGCAACCATAGTATTCGCAACCACAATAACC	FRIPVPQLLPKNPS*QQPQ*QVPLVQQQQFLGQQQPFPPQQPYPQPQPFPSQQPYLQLQPFPQPQLPYSQPQPFRPQQPYPQPQP*YSQPQ*	A	278	92	4	1	1	0	0	1	3	0.584579	0.543277	0.500043	0.502076	0.532494	0.0400311
Amp6*	GTTAGAGTTCCAGTGCCACAATTGCAGCCACAAAATCCATCTCAGCAACAGCCACAAGAGCAAGTTCCATTGGTACAACAACAAAAATTTCTATGGCAGCAACAACAATTTCCACCACAACAACCAGATCCACAGCCGCAACCATTTCCATCACAACAACCATATCTGCAGTTGCAACCATTTCCGCAGCCGCAACTACCATATTCGTAGTCGCAACCATTTCGACCACAACAACCATATCCACGACCGCAACCACAGTATTCGCAACCACAACAACC	VRVPVPQLQPQNPSQQQPQEQVPLVQQQKFLWQQQQFPPQQPDPQPQPFPSQQPYLQLQPFPQPQLPYS*SQPFRPQQPYPRPQPQYSQPQQ	A	278	92	1	0	1	0	0	0	1	1.97757	1.68416	2.58501	2.56472	2.20286	0.446012
Amp7	GTTAGAGTTCCAGTGCCACAATTGCAGCCACAAAATCCATCTCAGCAACAGCCACAAGAGCAAGTTCCATTGGTACAACAACAACAATTTCTAGGGCAGCAACAACCATTTCCACCACAACAACCATATCCACAGCCGCAACCATTTCCATCACAACAACCATATCTGCAGCTGCAACCATTTCCACAGCCGCAACTACCATATTCGCAACCACAACCATTTCGACCACAACAACCATATCCACAACCGCAACCACAGTATTCGCAACCACAACAACC	VRVPVPQLQPQNPSQQQPQEQVPLVQQQQFLGQQQPFPPQQPYPQPQPFPSQQPYLQLQPFPQPQLPYSQPQPFRPQQPYPQPQPQYSQPQQ	A	278	92	0	1	1	0	0	1	3	4.50061	4.39837	3.5003	3.57539	3.99367	0.52888
Amp8*	GTTAGAGTTCCAGTGCCACAATTGCAGCCACAAAATCCATCTCAGCAACAACCACAAGAGCAAGTTCTATTGGTGCAACAACAACCATTTCTAGGGCAGCAACAACAACAATTTCCAGGGCAGCAATAACCATTTCGACCACAACAGCCATATCCGCAGCCGCAACTATTTCCTCCAAAACTACCATATCCGCAGCCGCAACCATTTACACCACATCAATCATATCCACAACCACAACCACAGTATCCGCAACCACAACAACC	VRVPVPQLQPQNPSQQQPQEQVLLVQQQPFLGQQQQQFPGQQ*PFRPQQPYPQPQLFPPKLPYPQPQPFTPHQSYPQPQPQYPQPQQ	D	263	87	1	0	0	0	0	1	1	2.60344	2.07315	2.26976	2.0822	2.25714	0.24802
Amp9	GTTAGAGTTCCAGTGCCACAATTGCAGCCACAAAATCCATCTCAGCAACACCCACAAGAGCAAGTTCCGTTGGTACAACAACAACAATTTCTAGGGCAGCAACAATCATTTCCACCACAACAACCATATCCACAGCCGCAACCATTTCCATCACAACAACCATATCTGCAGCTGCAACCATTTCCGCAGCCGCAACTACCATATTTGCAGCCACAACCATTTCGACCACAACAACCATATCCACAACCGCAACCACAATATTCGCAACCACAACAACC	VRVPVPQLQPQNPSQQHPQEQVPLVQQQQFLGQQQSFPPQQPYPQPQPFPSQQPYLQLQPFPQPQLPYLQPQPFRPQQPYPQPQPQYSQPQQ	D	278	92	0	0	1	0	0	1	2	4.9222	4.20497	4.26559	5.48588	4.71966	0.605313
Amp10	GTTAGAGTTCCAGTGCCACAATTGCAGCCACAAAATCCATCTCAGCAACAACCACAAGAGCAAGTTCCATTGGTACAACAACAACAATTTCTAGGGCAGCAACAACAATTTCCAACACAACAACCATATCTGCAGCCGCAACCATTTCCATCACAACAACCATATCTGCAGCTGCAACCATTTTCGCAGCCGCAACTACCCATATTCGCAGCCGCAACCATTTCGACCACAACAACCATATCCACAACCGCAACCACAGTATTCGCAACCACAACAACC	VRVPVPQLQPQNPSQQQPQEQVPLVQQQQFLGQQQQFPTQQPYLQPQPFPSQQPYLQLQPFSQPQLPYSQPQPFRPQQPYPQPQPQYSQPQQ	B	279	93	0	0	0	0	0	0	0	1.73635	1.6407	1.23924	1.22585	1.46053	0.266198
Amp11*	GTTAGAGTTCCAGTGCCACAATTGCAGCCACAAAATCCATCTCAGCAACAGCCACAAGAGCAAGTTCCATTGGTACAACAACAAAAATTTCTAGGGCAGCAACAACAATTTCCACCACAACAACCATATCCATAGCCGCCACCATTTCCATCACAACAACCATATCTGCAGTTGCAACCATTTCCGCAGCCGCAACTACCATATTTGCAGCCGCAACCATTTCGACCACAACAACCATATCCACAACCGTAACCACAGTATCCGCAACCACAACAACC	VRVPVPQLQPQNPSQQQPQEQVPLVQQQKFLGQQQQFPPQQPYP*PPPFPSQQPYLQLQPFPQPQLPYLQPQPFRPQQPYPQP*PQYPQPQQ	D	278	92	2	0	1	0	0	1	2	1.90369	1.35385	2.048	1.70619	1.75293	0.300692
Amp12	GTTAGAGTTCCAGTGCCACAATTGCAGCCACAAAATCCATCTCAGCAACAACCACAAGAGCAAGTTCCATTGGTACAACAACAGCAATTTCCAGGGCAGCAACAACCATTTCCACCACAACAGCCATATCCGCAGCCGCAACCATTTCCATCACAACAACCATATCTGCAGCTGCAACCATTTCCGCAGCCGCAACTACCATATCCGCAGCCGCAACCATTTCGACCACAACAACCATATCCACAACCGCAACCACAGTATTCGCAACCACAACAACC	VRVPVPQLQPQNPSQQQPQEQVPLVQQQQFPGQQQPFPPQQPYPQPQPFPSQQPYLQLQPFPQPQLPYPQPQPFRPQQPYPQPQPQYSQPQQ	D	278	92	0	1	1	0	1	1	4	4.30502	3.81815	3.45247	3.345	3.73016	0.433463
Amp13	GTTAGAGTTCCAGTGCCACAATTGCAGCCACAAAATCCATCTCAGCAACAACCACAAGAGCAAGTTCCATTGGTACAACAACAACAATTTCCAGGGCAGCAACAACCATTTCCACCACAACAGCCATATCCGCAGCCGCAACCATTTCCATCACAACAACCATATCTGCAGCTGCAACCATTTCCGCAGCCGCAACTACCATATCCGCAGCCGCAACTACCATATCCGCAGCCGCAACTACCATATCCGCAGCCGCAACCATTTCGACCACAACAACCATATCCACAATCGCAACCACAGTATTCGCAACCACAACAACC	VRVPVPQLQPQNPSQQQPQEQVPLVQQQQFPGQQQPFPPQQPYPQPQPFPSQQPYLQLQPFPQPQLPYPQPQLPYPQPQLPYPQPQPFRPQQPYPQSQPQYSQPQQ	D	320	106	0	1	1	2	3	1	8	2.65342	3.09885	2.33716	1.80617	2.4739	0.543863
Amp14*	GTTAGAGTTCCAGTGCCACAATTGCAGCCACAAAATCCATCTCAGCAACAGCCACAAGAGCAAGTTCCATTGGTACAACAACAACAATTTCTGGGGCAGCAACAACCATTTCCACCACAACAACCATATCCACAGCCGCAACCATTTCCATCACAACAACCATATCTACAGCTGCAACCATTTCCGTAGCTGCAACAACCATATTCGCAGCCGCAACCATTTCGACCACAACAACCATATCCACAACCGCAACCACAGTATTCGCAACCACAACAACC	VRVPVPQLQPQNPSQQQPQEQVPLVQQQQFLGQQQPFPPQQPYPQPQPFPSQQPYLQLQPFP*LQQPYSQPQPFRPQQPYPQPQPQYSQPQQ	A	278	92	1	1	0	0	0	1	2	1.64943	1.69503	1.99583	2.17783	1.87953	0.25133
Amp15	GTTAGAGTTCCAGTGCCACAATTGCAGCCACAAAATCCATCTCAGCAACAGCCACAAGAGCAAGTTCCATTGGTACAACAACAACAATTTCTAGGGCAGCAACAACCATTTCCACCACAACAACCATATCCACAGCCGCAACCATTTCCATCACAACAACCATATCTGCAGCTGCAACCATTTCTGCAGCCGCAACTACCATATTCACAGCCACAACCATTTCGACCACAACAACCATATCCACAACCACAACCACAGTATTCGCAAGCACAACAACC	VRVPVPQLQPQNPSQQQPQEQVPLVQQQQFLGQQQPFPPQQPYPQPQPFPSQQPYLQLQPFLQPQLPYSQPQPFRPQQPYPQPQPQYSQAQQ	A	278	92	0	1	0	0	0	1	2	0.273818	0.2586	0.332638	0.256472	0.280382	0.0356833
Amp16	GTTAGAGTTCCAGTGCCACAATTGCAGCCACAAAATCCATCTCAGCAACAACCACAAGAGCAAGTTCCATTGGTACAACAACAACAATTTCCAGGGCAGCAACAACCATTTCCACCACAACAGCCATATCCGCAGCTGCAACCATTTCCATCACAACAACCATATATGCAGCTGCAACCATTTCCGCAGCCGCAACTACCATATCCGCAGCCGCAACTACCATATCCGCAGCCGCAACCATTTCGACCACAACAATCATATCCACAACCGCAACCACAGTATTCGCAACCACAACAACC	VRVPVPQLQPQNPSQQQPQEQVPLVQQQQFPGQQQPFPPQQPYPQLQPFPSQQPYMQLQPFPQPQLPYPQPQLPYPQPQPFRPQQSYPQPQPQYSQPQQ	D	299	99	0	1	1	1	2	0	5	0.641081	0.569355	0.534829	0.258645	0.500978	0.167507
Amp17*	TTTAGAATTCCAGTGCCACAATTGCAGCCACAAAATCCATCTTAGCAACAGACACAATAGCAAGTTCCATTGGTACAACAACAACAATTTCTAGGGCAGCAACAACCATTTCCACCACAACAACCATATCCACAGCCGCAACCATTTCCATCACAACAACCATATCTGCAGCTGCAACCATTTCCGCAGCCGCAACTACCATATTCGCAGCCGCAACCATTTCGACCACAACAACCATATACACAACCGCAACCATAGTATTCGCAACCGCAATAACC	FRIPVPQLQPQNPS*QQTQ*QVPLVQQQQFLGQQQPFPPQQPYPQPQPFPSQQPYLQLQPFPQPQLPYSQPQPFRPQQPYTQPQP*YSQPQ*	A	278	92	4	1	1	0	0	0	2	0.15864	0.0977899	0.221758	0.115195	0.148346	0.0552276
Amp18*	GTTAGAGTTCCAGTGCCACAATTGCAGCCATAAAATCCATCTCAGCAACAGCCACAAGAGCAAGTTCCATTGGTACAACAACAACAATTTCTAGGGCAGCAACAACCATTTCCACCACAACAACCATATCCACAGGCGCAACCATTTCCATCACAACAACCATATCTGCAGCTGCAACCATTTCCGCAGCCGCAACTACCATATTCGCAGCCACAACCATTTCGACCACAACAACCATATCCACAACCGCAACCACAGTATTCGCAACCACAACAACC	VRVPVPQLQP*NPSQQQPQEQVPLVQQQQFLGQQQPFPPQQPYPQAQPFPSQQPYLQLQPFPQPQLPYSQPQPFRPQQPYPQPQPQYSQPQQ	A	278	92	1	1	1	0	0	1	3	2.84466	3.05539	2.92199	3.05375	2.96895	0.103788
Amp19	GTTAGAGTTCCAGTGCCACAATTGCAGCCACAAAATCCATCTCAGCAACAACCACAAGAGCAAGTTCCATTGGTGCAACAACAACAATTTCTAGGGCAGCAACAACAACAATTTCCAGGGCAACAACAACCATTTCCACCACAACAGCCATATCCGCAGCCGCAACCATTTCTGCCACAACTACCATATCCGCAGCCGCAACCATTTCCACCACAACAATCATATCCACAACCACAACCACAATATCCGCAACCACAACAACC	VRVPVPQLQPQNPSQQQPQEQVPLVQQQQFLGQQQQQFPGQQQPFPPQQPYPQPQPFLPQLPYPQPQPFPPQQSYPQPQPQYPQPQQ	B	263	87	0	1	0	0	0	0	1	15.462	18.3823	14.4773	14.7145	15.7591	1.79849
Amp20	GTTAGAGTTCCAGTGCCACAATTGCAGCCACAAAATCCATCTCAGCAACAGCCACAAGAGCAAGTTCCATTGGTACAACAACAACAATTTCTAGGGCAGCAACAACCATTTCCACCACAACAACCATATCCACAGCCGCAACCATTTCCATCACAACAACCATATCTGCAACTGCAACCATTTCCGCAGCCGCAACTACCATATTCGCAACCACAACCATTTCGACCACAACAACCATATCCACAACCGCAACCACAGTATTCGCAACCACAACAACC	VRVPVPQLQPQNPSQQQPQEQVPLVQQQQFLGQQQPFPPQQPYPQPQPFPSQQPYLQLQPFPQPQLPYSQPQPFRPQQPYPQPQPQYSQPQQ	A	278	92	0	1	1	0	0	1	3	4.01599	3.879	3.80468	4.06225	3.94048	0.119376
Amp22	GTTAGATTTCCAGTGCCACAATTGCAGCCACAAAATCCATCTCAGCAACAGCCACAAGAGCAAGTTCCATTGGTACAACAACAACAATTTCTAGGGCAGCAACAACCATTTCCACCACAACAACCATATCCACAGCCGCAACCATTTCCATCACAACTACCATATCTGCAGCTGCAACCATTTCCGCAGCCGCAACTACCATATTCACAGCCACAACCATTTCGACCACAACAACCATATCCACAACCGCAACCACAGTATTCGCAACCACAACAACC	VRFPVPQLQPQNPSQQQPQEQVPLVQQQQFLGQQQPFPPQQPYPQPQPFPSQLPYLQLQPFPQPQLPYSQPQPFRPQQPYPQPQPQYSQPQQ	A	278	92	0	1	1	0	0	1	3	0.0912726	0.0673664	0.0652231	0.0565107	0.0700932	0.0148796
Amp27*	GTTAGAGTTCCAGTGCCACAATTGCAGCCACAAAATCCATCTCAGCAACAACCACAAGAGCAAGTTCCATTGGTGCAACAACAACAATTTCTAGGGCAGTAACAACAACAATTTCCAGGGCAACAACAACCATTTCCACCATAACAGCCATATCCGCAGCCGCAACCATTTCTGCCACAACTACCATATCCGCAGCCGCAACCATTTCCACCACAACAATCATATCCACAACCACAACCACAATATCCGCAACCACAACAACC	VRVPVPQLQPQNPSQQQPQEQVPLVQQQQFLGQ*QQQFPGQQQPFPP*QPYPQPQPFLPQLPYPQPQPFPPQQSYPQPQPQYPQPQQ	B	263	87	2	0	0	0	0	0	0	1.81676	2.08184	1.61971	2.07785	1.89904	0.223747
Amp28*	GTTAGAGTTCCAGTGCCACAACTGCAGCCACAAAATCCATCTCAGCAACAGCCACAAGAGCAAGTTCCATTGGTACAACAACAAAAATTTCTAGGGGAGCAACAACAATTTCCACCACAACAACTAGATCCATAGCCGCCACCATTTCCATCACAACAACCATATCTGCAGTTGCAACCATTTCCGCAGCCGCAACTACCATATTTGCAGCCGCAACCATTTCGACCACAACAACCATATCCACAACCGCAACCACAGTATCCGCAACCACAACAACC	VRVPVPQLQPQNPSQQQPQEQVPLVQQQKFLGEQQQFPPQQLDP*PPPFPSQQPYLQLQPFPQPQLPYLQPQPFRPQQPYPQPQPQYPQPQQ	D	278	92	1	0	1	0	0	1	2	0.336839	0.319447	0.200017	0.308635	0.291235	0.0619115
Amp29	GTTAGAGTTCCAGTGCCACAATTGCAGCCACAAAATCCATCTCAGCAACAGCCACAAGAGCAAGTTCCATTGGTACAACAACAACAATTTCCAGGGCAGCAACAACAATTTCCACCACAACAGCCATATCCGCAGCCGCAACCATTTCCATCACAACAACCATATCTGCAACTGCAACCATTTCCGCAGCCGCAACCATTTCCGCCACAACTACCATATCCGCAGCCGCAATCATTTCCACCACAACAACCATATCCACAACAGCAACCACAGTATCTACAACCACAACAACC	VRVPVPQLQPQNPSQQQPQEQVPLVQQQQFPGQQQQFPPQQPYPQPQPFPSQQPYLQLQPFPQPQPFPPQLPYPQPQSFPPQQPYPQQQPQYLQPQQ	B	293	97	0	0	0	0	0	0	0	0.0651947	0.0521546	0.00652231	0.0130409	0.0342281	0.028849
Amp30	GTTAGAGTTCCAGTGCCACAATTGCAGCCACAAAATCCATCTCAGCAACAGCCACAAGAGCAAGTTCCGTTGGTACAACAACAACAATTTCTAGGGCAGCAACAACCATTTCCACCACAACAACCATATCCACAGCCGCAACCATTTCCATCACAACAACCATATCTGCAACTGCAACCATTTCCGCAGCCGCAACTATCATATTCGCAGCCACAACCATTTCGACCACAACAACCATATCCACAACCGCAACCACAGTATTCGCAACCACAACAACC	VRVPVPQLQPQNPSQQQPQEQVPLVQQQQFLGQQQPFPPQQPYPQPQPFPSQQPYLQLQPFPQPQLSYSQPQPFRPQQPYPQPQPQYSQPQQ	D	278	92	0	1	0	0	0	1	2	3.50313	3.60519	3.29376	3.14286	3.38624	0.207674
Amp31	GTTAGAGTTCCAGTGCCACAATTGCAGCCACAAAATCCATCTCAGCAACAACCACAAGAGCAAGTTCCATTGGTACAACAACAGCAATTTCCAGGGCAGCAACAACCATTTCCACCACAACAACCATATCCGCAGCCGCAACCATTTCCATCACAACAACCATATCTGCAGCTGCAACCATTTCCGCAGCCGCAACTACCATATCCGCAGCCGCAACTACCATATCCGCAGCCGCAACCATTTCGACCACAACAACCATATCCACAACCGCAACCACAGTATTCGCAACCACAACAACC	VRVPVPQLQPQNPSQQQPQEQVPLVQQQQFPGQQQPFPPQQPYPQPQPFPSQQPYLQLQPFPQPQLPYPQPQLPYPQPQPFRPQQPYPQPQPQYSQPQQ	D	299	99	0	1	1	1	2	1	6	3.48792	3.81381	3.90686	3.84707	3.76392	0.187983
Amp32	GTTAGAGTTCCAGTGCCACAACCGCAGCCACAAAATCCATCTCAGCCACAGCCACAAGGGCAAGTTCCATTGGTACAACAACAACAATTTCCAGGGCAGCAACAACAATTTCCACCACAACAGCCATATCCGCAGCCGCAACCATTTCCATCACAACAACCATATCTGCAATTGCAACCATTTCCACAACCGCAACCATTTCCGCCACAACTACCATATCCGCAGCCACCACCATTTTCACCACAACAACAATATCCACAACCGCAACCACAGTATCCGCAACCACAACAACC	VRVPVPQPQPQNPSQPQPQGQVPLVQQQQFPGQQQQFPPQQPYPQPQPFPSQQPYLQLQPFPQPQPFPPQLPYPQPPPFSPQQQYPQPQPQYPQPQQ	B	293	97	0	0	0	0	0	0	0	1.14308	1.43208	1.83929	1.49319	1.47691	0.285795
Amp36	GTTAGAGTTCCAGTGCCACAATTGCAGCCACAAAATCCATCTCAGCAACAGCCACAAGAGCAAGTTCCATTGGTACAACAACAACAATTTCTAGGGCAGCAACAACCATTTCCACCACAACAACCATATCCACAGCCGCAACCATTTCCATCACAACAACCATATCTGCAACTGCAACCATTTCTGCAGCCGCAACTACCATATTCACAGCCACAACCATTTCGACCACAACAACCATATCCACAACCGCAACCACAGTATTCGCAACCACAACAACC	VRVPVPQLQPQNPSQQQPQEQVPLVQQQQFLGQQQPFPPQQPYPQPQPFPSQQPYLQLQPFLQPQLPYSQPQPFRPQQPYPQPQPQYSQPQQ	A	278	92	0	1	0	0	0	1	2	1.59727	1.21694	1.58927	1.66489	1.51709	0.202956
Amp37*	GTTAGAGTTCCAGTGCCACAATTGCAACCAGAAAATCCATCTCAGCAACAACCACAAGAGCAAGTTCCATTGGTGCAACAACAACAATTTCTAGGGCAGCAACAACAACAATTTCCAGGGCAGCAATAACCATTTCGACCACAACAGCCATATCCGCAGCCGCAACCATTTCCTCCACAACTACCATGTCCGCAGCCGCAACCATTTCCACCACAACAATCATATCCACAACCACAACCACAATATCCGCAACCACAACAACC	VRVPVPQLQPENPSQQQPQEQVPLVQQQQFLGQQQQQFPGQQ*PFRPQQPYPQPQPFPPQLPCPQPQPFPPQQSYPQPQPQYPQPQQ	D	263	87	1	0	0	0	0	1	1	1.69506	1.519	1.69145	1.76487	1.6676	0.104667
Amp38*	GTTAGAGTTCCAGTGCCACAATTGCAGCCACAAAATCCATCTCAGCAACAGCCACAAGAGCAAGTTCCATTGGTACAACAACAACAATTTCTAGGGCAGCAATAACCATTTCGACCACAACAACCATATCCACAGCCGCAACCATTTCCTCCACAACTACCATGTCCGCAGCCGCAACCATTTCCACCACAACAACCATATCCACAACCGCAACCACAGTATCCGCAACCACAACAACC	VRVPVPQLQPQNPSQQQPQEQVPLVQQQQFLGQQ*PFRPQQPYPQPQPFPPQLPCPQPQPFPPQQPYPQPQPQYPQPQQ	A/D	239	79	1	0	0	0	0	1	1	1.99061	1.70372	1.46317	2.55602	1.92838	0.470708
Amp41*	GTTAGAGTTCCAGTGCCACAATTGCAGCCACAAAATCCATCTCAGCAATAGCCACAAGAGCAAGTTCCATTGGTACAACAACAACAATTTCTAGGGCAGCAACAACCATTTCCACCACAACAACCATATCCACAGCCGCAACCATTTCCATCACAACAACCATATCTGCAGCTGCAACCATTTCCGCAGCCGCAACTAGCATATTCGCAGCCACAACCATTTTGACCACAACAACCATATCCACAACCGCAACCACAGTATCCGCAACCACAACAACC	VRVPVPQLQPQNPSQQ*PQEQVPLVQQQQFLGQQQPFPPQQPYPQPQPFPSQQPYLQLQPFPQPQLAYSQPQPF*PQQPYPQPQPQYPQPQQ	A	278	92	2	1	0	0	0	0	1	1.5951	1.93841	2.07844	2.10611	1.92952	0.234719
Amp46	GTTAGAGTTCCAGTGCCACAATTGCAGCCACAAAATCCATCTCAGCAACAGCCACAAGAGCAAGTTCCATTGGTACAACAACAACAATTTCTAGGGCAGCAACAACCATTTCCACCACAACAACCATATCCACAGCCGCAACCATTTCCATCACAACAACCATATCTGCAGCTGCAACCATTTTCGCAGCCGCAACTACCATATTCGCAGCCACAACCATTTCGACCACAACAACCATATCCACAACCGCAACCACAGTATTCGCAACCACAACAACC	VRVPVPQLQPQNPSQQQPQEQVPLVQQQQFLGQQQPFPPQQPYPQPQPFPSQQPYLQLQPFSQPQLPYSQPQPFRPQQPYPQPQPQYSQPQQ	A	278	92	0	1	0	0	0	1	2	2.4774	2.37521	2.43282	1.96266	2.31202	0.236635
Amp48*	GTTAGAGTTCCAGTGCCACAATTGCAGCCATAAAATCCATCTCAGCAACAGCCACAAGAGCAAGTTCCATTGGTACAACAACAACAATTTCTAGGGCAGTAACAACCATTTCCACCACAACAACCATATCCACAGCCGCAACCATTTCCATCACAACAACCATATCTGCAGCTGCAACCATTTCCGCAGCCGCAACTACCATATTCGCAGCCACAACCATTTCGACCACAACAACCATATCCACAACCGCAACCACAGTATCCGCAACCACAACAACC	VRVPVPQLQP*NPSQQQPQEQVPLVQQQQFLGQ*QPFPPQQPYPQPQPFPSQQPYLQLQPFPQPQLPYSQPQPFRPQQPYPQPQPQYPQPQQ	A	278	92	2	0	1	0	0	1	2	0.302069	0.232523	0.271763	0.208655	0.253752	0.0414059
Amp52	GTTAGAGTTCCAGTGCCACAATTGCAGCCACAAAATCCATCTCAGCAACAACCACAAGAGCAAGTTCCATTGGTACAACAACAGCAATTTCCAGGGCAGCAACAACCATTTCCACCACAACAGCCATATCCGCAGCCGCAACCATTTCCATCACAACAACCATATCTGCAGCTGCAACCATTTCCACAGCCGCAACTACCATATCCGCAGCCGCAACCATTTCGACCACAACAACCATATCCACAGCCGCAACCACAGTATTCGCAACCACAACAACC	VRVPVPQLQPQNPSQQQPQEQVPLVQQQQFPGQQQPFPPQQPYPQPQPFPSQQPYLQLQPFPQPQLPYPQPQPFRPQQPYPQPQPQYSQPQQ	D	278	92	0	1	1	0	1	1	4	0.491134	0.408545	0.402209	0.480341	0.445557	0.0466766
Amp55*	GTTAGAGTTACAGTGCCACAATTGCAGCCATAAAATCCATCTCAGCAACAGCCACAAGAGCAAGTTCCATTGGTGCAACAACTACAATATCCAGGGCAACAACAACCATTTCCACCACAACAGCCATATCCGCAGCCGCAACCATTTCCATCACAACAACCATTGCCGCAACCGCAACCATTTCTGCCACAACTACCATATCCGCAGCCACAACCATTTCCACCACAACAACCATATCCACAACCGCAACCACAGTATCCGCAACCACAACAACC	VRVTVPQLQP*NPSQQQPQEQVPLVQQLQYPGQQQPFPPQQPYPQPQPFPSQQPLPQPQPFLPQLPYPQPQPFPPQQPYPQPQPQYPQPQQ	B	275	91	1	1	0	0	0	0	1	0.882302	0.990938	0.950083	0.969376	0.948175	0.046979
Amp75	GTTAGAGTTCCAGTGCCACAATTGCAGCCGCAAAATCCATCTCAGCAACAACCACAAGAGCAAGTTCCATTGGTGCAACAACAACAATTTCCAGGGCAGCAACAACCATTTCCACCACAACAGCCATATCCGCAGCCGCAACCATTTCCATCACAACAACCATATCCGCAGCCGCAACCATTTCCGTCACAACTACCATATCCGCAGCCGCAACCATTTCCACCACAACAACCCTATCCACAACCGCAACCACAATATCCGCAACCACAACAACC	VRVPVPQLQPQNPSQQQPQEQVPLVQQQQFPGQQQPFPPQQPYPQPQPFPSQQPYPQPQPFPSQLPYPQPQPFPPQQPYPQPQPQYPQPQQ	B	275	91	0	1	0	0	0	0	1	1.42124	1.54073	1.85233	1.52796	1.58557	0.185737
Amp84	GTTAGAGTTCCAGTGCCACAATTGCAGCCACAAAATCCATCTCAGCAACAACCACAAGAGCAAGTTCCATTGGTACAACAACAACAATTTCCAGGGCAGCAACAACCATTTCCACCACAACAGCCATATCCGCAGCCGCAACCATTTCCATCACAACAACCATATCTGCAGCTGCAGCCATTTCCGCAGCCGCAACTACCATATCCGCAGCCGCAACTACCATATCCGCAGCCGCAACCATTTCGACCACAACAATCATATCCACAACCGCAACCACAGTATTCGCAACCACAACAACC	VRVPVPQLQPQNPSQQQPQEQVPLVQQQQFPGQQQPFPPQQPYPQPQPFPSQQPYLQLQPFPQPQLPYPQPQLPYPQPQPFRPQQSYPQPQPQYSQPQQ	D	299	99	0	1	1	1	2	0	5	0.521558	0.593259	0.660927	0.532505	0.577062	0.0641919
Amp90*	GTTAGAGTTCCAGTGCCACAATTGCAACCAGAAAATCCATCTCAGCAACAACCACAAGGGCAAGTTCCATTGGTGCAACAACAACAATTTCTAGGGCAGCAACAACAACAATTTCCAGGGCAGCAATAACCATTTCGACCACAACAGCCATATCCGCAGCCGCAACCATTTCCTCCACAACTACCATGTCCGCAACCGCAACCATTTCCACCACAACAATCATATCCACAACCACAACCACAGTATCCGCAACCACAACAACC	VRVPVPQLQPENPSQQQPQGQVPLVQQQQFLGQQQQQFPGQQ*PFRPQQPYPQPQPFPPQLPCPQPQPFPPQQSYPQPQPQYPQPQQ	D	263	87	1	0	0	0	0	1	1	0.180372	0.158637	0.176102	0.182573	0.174421	0.0108602
Amp97*	GTTAGAGTTCCAGTGCCACAATTGCAGCCACAAAATCCATCTCAGCAACAGCCACAAGAGCAAGTTCCATTGGTACAACAACAACAATTTCTAGGGCAGCAACAACCATTTCCACCACAACAACCATATCCACAGCCGCAACCATTTCCATCACAACAACCATATCTGCAGCTGCAACCATTTCCGCAGCCGCAACTACCATATTCACAGCCACAACCATTTCGACCACAACAACCATATCCACAACCGCAACCATAGTATTCGCAACCACAACAACC	VRVPVPQLQPQNPSQQQPQEQVPLVQQQQFLGQQQPFPPQQPYPQPQPFPSQQPYLQLQPFPQPQLPYSQPQPFRPQQPYPQPQP*YSQPQQ	A	278	92	1	1	1	0	0	1	3	0.249913	0.208619	0.20654	0.260819	0.231472	0.0279594
Amp101*	GTTAGAGTTCCAGTGCCACAATTGCAGCCGCAAAATCCATCTCAACAACAACCACAAGAGTAAGTTCCATTGATGCAACAACAACAACAATTTCCAGGGCAGCAAGAACAATTTCCACCACAACAGCCATATCCGCATCAGCAACCATTTCCATCACAACAACCATATCCGCAGCCGCAACCATTTCCGCCACAACTACCATATCCGCAGACGCAACCATTTCCACCACAACAACCATATCCACAACCGCAACCACAGTATTCGCAACCACAACAACC	VRVPVPQLQPQNPSQQQPQE*VPLMQQQQQFPGQQEQFPPQQPYPHQQPFPSQQPYPQPQPFPPQLPYPQTQPFPPQQPYPQPQPQYSQPQQ	B	278	92	1	0	0	0	0	0	0	1.64725	1.87757	2.0067	1.57361	1.77628	0.200894
Amp103	GTTAGAGTTCCAGTGCCACAATTGCAGCTACAAAATCCATCTCAGCAACAGCCACAAGAGCAAGTTCCATTGGTACAAGAACAACAATTTCCAGGGCAGCAACAACCATTTCCACCACAACAGCCATATCCACAGCCGCAACCATTTCCATCACAACAACCATATCTGCAGCTGCAACCATTTCCGCAGCCGCAACTACCATATTCGCAGCCACAACCATTTCGACCACAACAACCATATCCACAACCGCAACCACAGTATTCGCAACCACAACAACC	VRVPVPQLQLQNPSQQQPQEQVPLVQEQQFPGQQQPFPPQQPYPQPQPFPSQQPYLQLQPFPQPQLPYSQPQPFRPQQPYPQPQPQYSQPQQ	A	278	92	0	1	1	0	0	1	3	0.932284	0.884456	0.732672	1.0411	0.897628	0.128023
Amp113	GTTAGAGTTCCAGTGCCACAATTGCAGCCGCAAAATCCATCTCAACAACAACCACAAGAGCAAGTTCCATTGATGCAACAACAACAACAATTTCCAGGGCAGCAAGAACAATTTCCACCACAACAGCCATATCCGCATCAGCAACCATTTCCATCACAACAACCATATCCGCAGCCGCAACCATTTCCGCCACAACTACCATATCCGCAGACGCAACCATTTCCACCACAACAACCATATCCACAACCGCAACCACAGTATCCGCAACCACAACAACC	VRVPVPQLQPQNPSQQQPQEQVPLMQQQQQFPGQQEQFPPQQPYPHQQPFPSQQPYPQPQPFPPQLPYPQTQPFPPQQPYPQPQPQYPQPQQ	B	278	92	0	0	0	0	0	0	0	0.15864	0.171676	0.167406	0.14345	0.160293	0.0124709
Amp117*	GTTAGAGTTCCAGTGCCACAATTGCAGCCACAAAATCCATCTCAGCAACAACCACAAGAGCAAGCTCCATTGGTGCAACAACAACAATTTCTAGGGCAGCAATAACCATTTCGACCACAACAACCATATCCACAGCCGCAACCATTTCCTCCACAACTACCATGTCCGCAGCCGCAACCATTTCCACCACAACAATCATATCCACAACCACAACCACAGTATTCGCAACCACAACAACC	VRVPVPQLQPQNPSQQQPQEQAPLVQQQQFLGQQ*PFRPQQPYPQPQPFPPQLPCPQPQPFPPQQSYPQPQPQYSQPQQ	A/D	239	79	1	0	0	0	0	1	1	0.352051	0.29337	0.308722	0.38036	0.333626	0.0398511
Amp119	GTTAGAGTTCCAGTGCCACAATTGCAGCCACAAAATCCATCTCAGCAACAACCACAAAAGCAAGTTCCATTGGTACAACAACAACAATTTCCAGGGCAGCAACAACCATTTCCACCACAACAGCCATATCCGCAGCCGCAACCATTTCCATCACAACAACCATATCTGCAGCTGCAGCCATTTCCGCAGCCGCAACTACCATATCCGCAGCCGCATCTACCATATCCGCAGCCGCAACCATTTCGACCACAACAACCATATCCACAACCGCAACCACAGTATTCGCAACCACAACAACC	VRVPVPQLQPQNPSQQQPQKQVPLVQQQQFPGQQQPFPPQQPYPQPQPFPSQQPYLQLQPFPQPQLPYPQPHLPYPQPQPFRPQQPYPQPQPQYSQPQQ	D	299	99	0	1	1	0	1	1	4	1.04746	0.875763	1.03487	1.08674	1.01121	0.0929611
Amp126	GTTAGAGTTCCAGTGCCACAATTGCAGCCAAAAAATCCATCTCAGCAACAGCCACAAGAGCAAGTTCCATTGGTACAAGAACAACAATTTCCAGGGCAGCAACAACCATTTCCACCACAACAGCCATATCCGCAGCCGCAACCATTTCCATCACAACAACCATATCTGCAGCTGCAACCATTTCCACAGCCGCAACTACCATATCCGCAGCCGCAACCATTTCGACCACAACAACCATATCCACAGCCGCAACCACAGTATTCGCAACCACAACAACC	VRVPVPQLQPKNPSQQQPQEQVPLVQEQQFPGQQQPFPPQQPYPQPQPFPSQQPYLQLQPFPQPQLPYPQPQPFRPQQPYPQPQPQYSQPQQ	D	278	92	0	1	1	0	1	1	4	0.173853	0.152118	0.171754	0.158665	0.164097	0.0104374
